# Supplementary material for: The genetic regulatory signature of type 2 diabetes in human skeletal muscle
Source: PubMed Central journal article supplement (PMC4931250; doi:10.1038/ncomms11764), 2016-06-29
Supplement: ncomms11764-s1.pdf [file ncomms11764-s1.pdf]

## Supplementary Figures

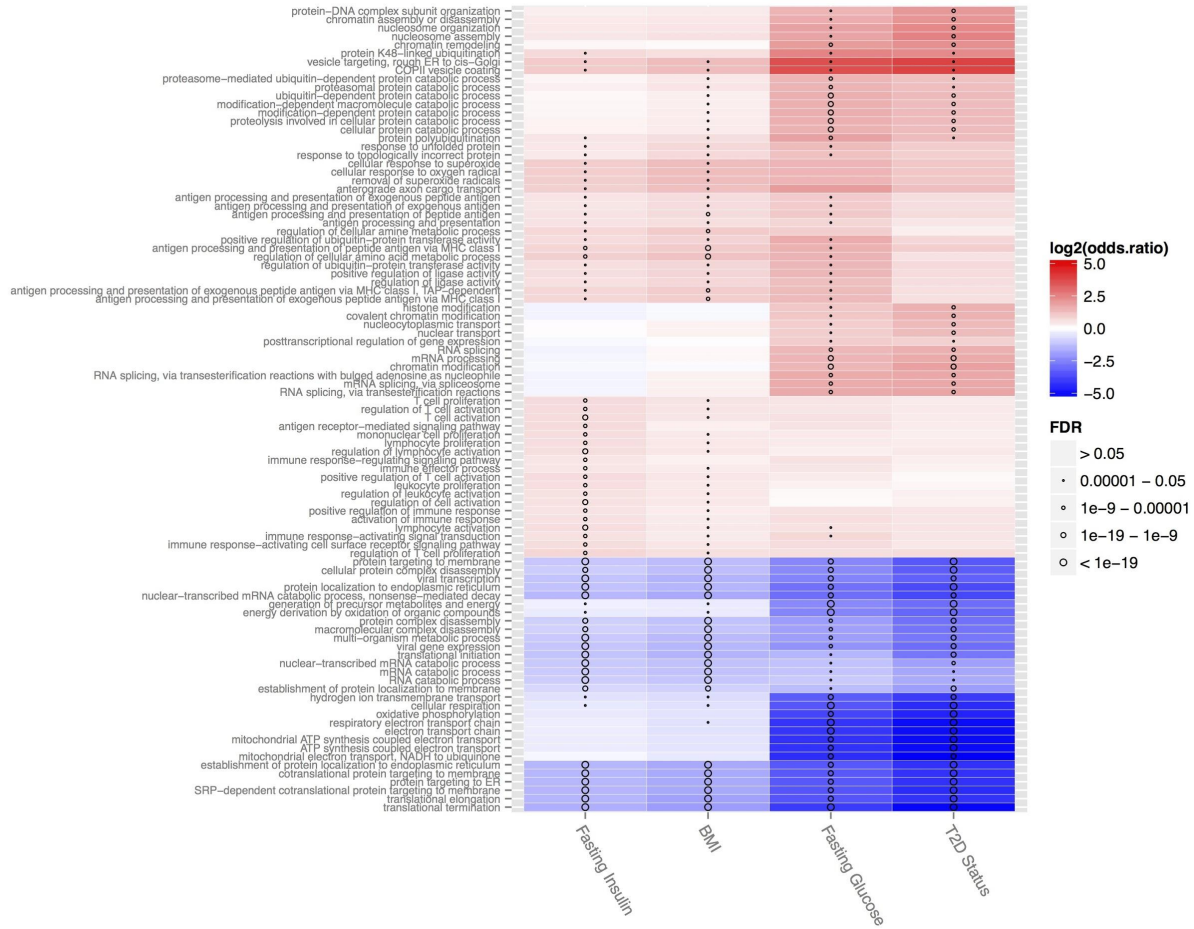

**Supplementary Figure 1.** Heatmap of GO terms for differentially expressed genes. The terms were hierarchically clustered using the GO term enrichment beta. Darker red, higher positive gene expression-trait association; darker blue, stronger negative association. Larger circle sizes represent more significant GO terms.

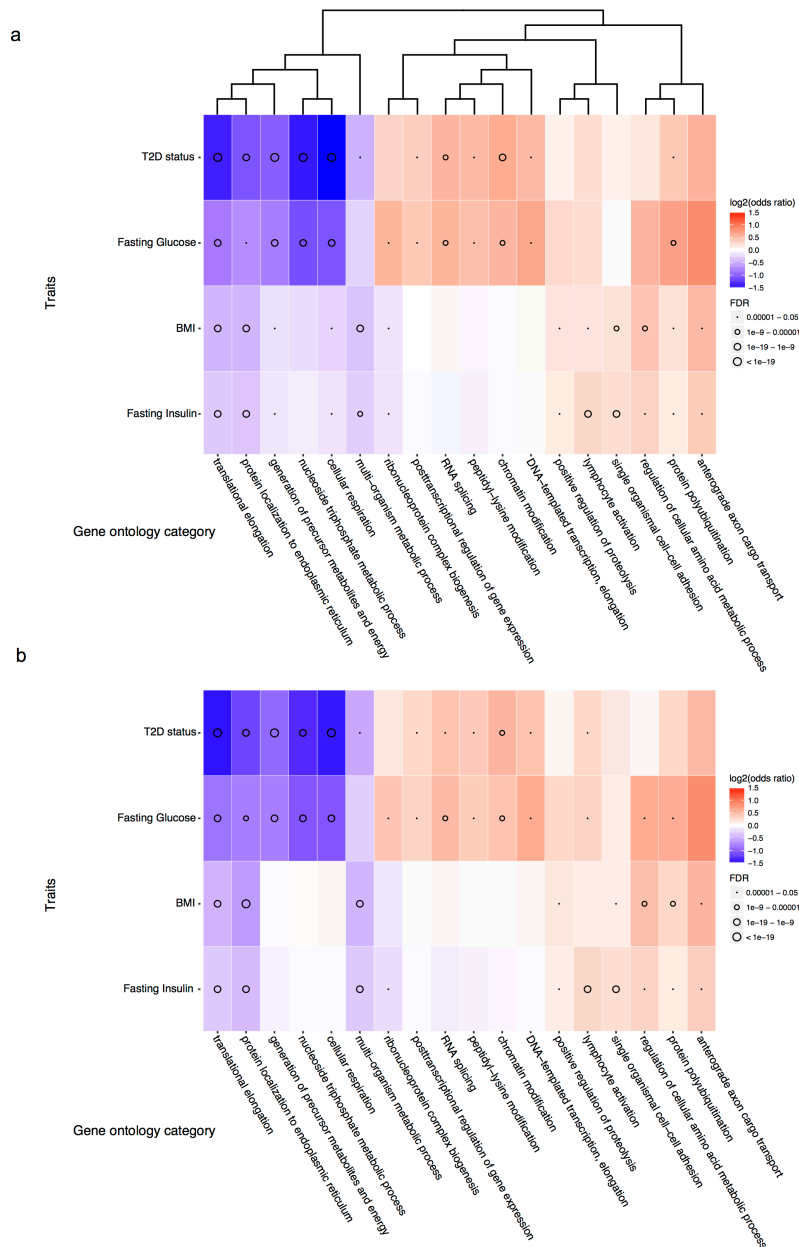

**Supplementary Figure 2.** Heat maps for GO terms for differential expression analyses without (a) (as in Figure 1c) and with (b) adjusting for fraction white blood cell and fraction lymph from the muscle tissue heterogeneity deconvolution analysis (see Methods). To facilitate comparison between the results of the two analyses, we show the same go terms in (b) as in (a). For each GO term and trait we see similar patterns of higher or lower gene expression with the trait for analyses with and without adjustment for muscle cell heterogeneity. The strength of associations shows some variability between the two analyses.

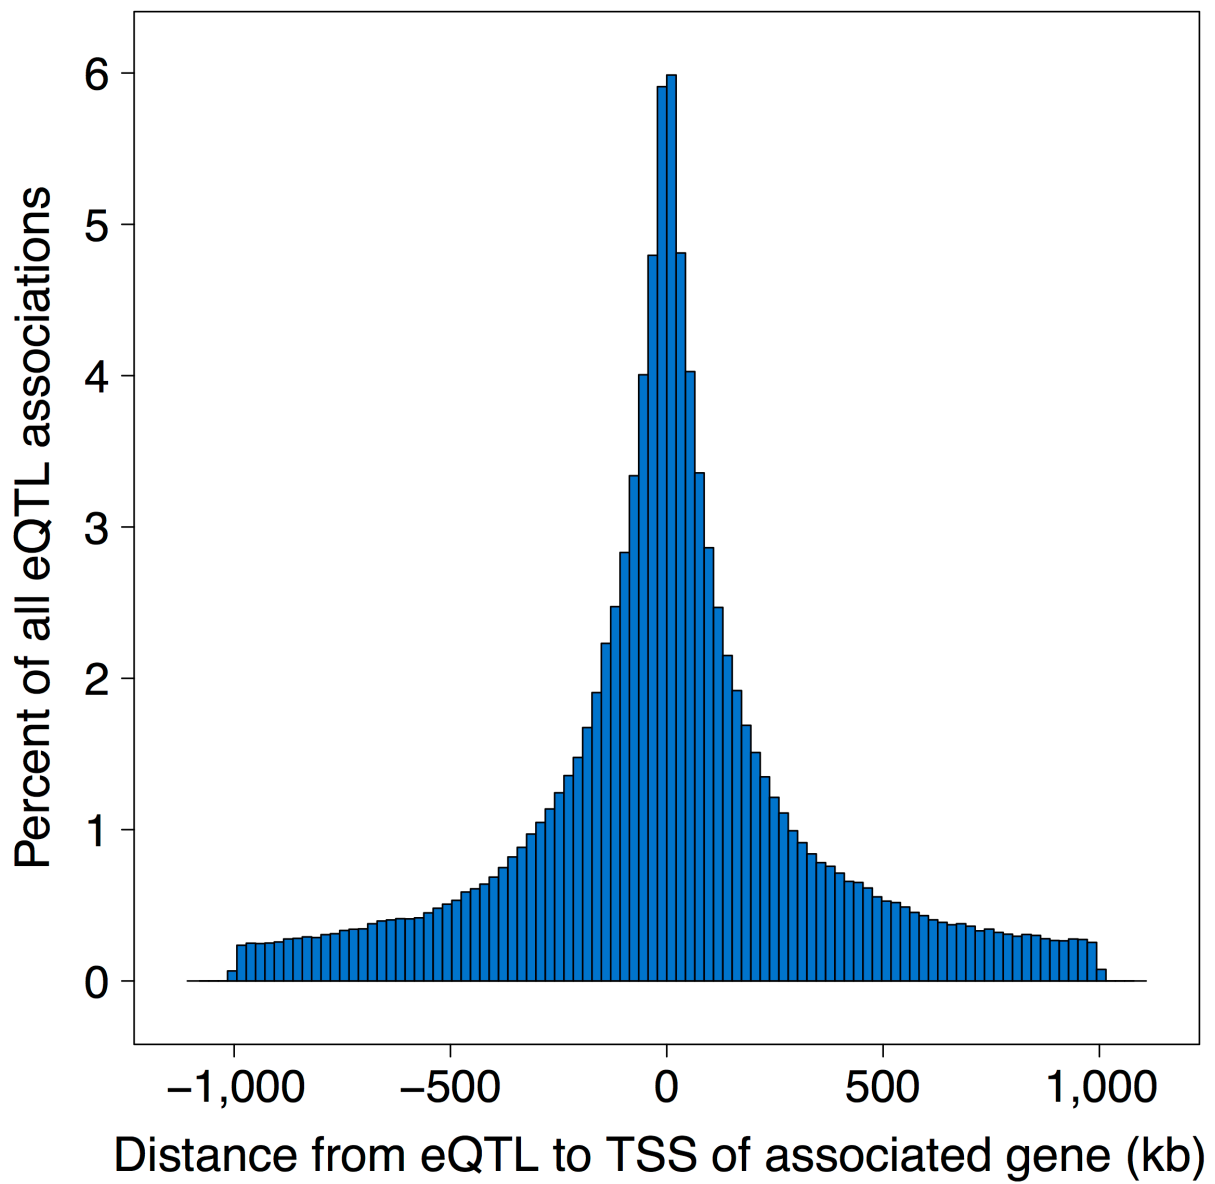

**Supplementary Figure 3.** Distance (kb) from the cis-eQTL to transcription start site (TSS) of the associated gene.

a

|                      | Significant ASE | Not significant ASE | Not tested for ASE | Total  |
|----------------------|-----------------|---------------------|--------------------|--------|
| Significant eQTL     | 6,830           | 1,650               | 5999               | 14,479 |
| Not significant eQTL | 231             | 112                 | 627                | 970    |
| Not tested for eQTL  | 345             | 62                  | [REDACTED]         | 407    |
| Total                | 7,406           | 1,824               | 6,626              | 15,856 |

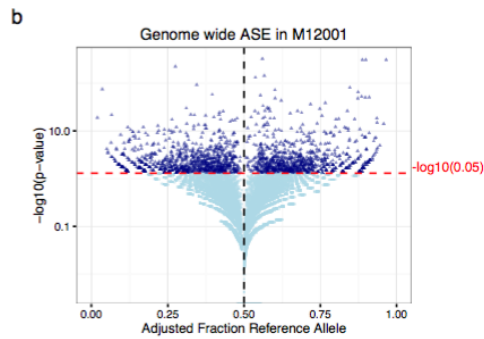

**Supplementary Figure 4.** Allelic bias in RNA-seq data and comparison with eQTL results. (a) Comparison of eQTL and ASE results in protein coding genes on the autosomes. To be tested for ASE the gene must have at least one SNP that passes filters, has  $\geq 30x$  coverage, and is present in  $\geq 10$  samples. Significance is determined by Fisher's Combined Probability test and Storey's FDR correction ( $q$ -value  $\leq 0.05$ ). 94.57% of genes tested for an eQTL have a significant eQTL and 80.24% of genes tested for ASE have significant ASE suggesting almost all genes have genetic regulation. 407 genes were tested by ASE but not for an eQTL and 84.8% had significant ASE. (b) Volcano plot of genome-wide ASE in one muscle sample, M12001. The adjusted fraction reference allele uses a sample specific, allele pair specific expectation to adjust for residual reference allele alignment bias after filtering steps. Reference + Alternate allele count is restricted to those sites with  $\geq 30x$  coverage.

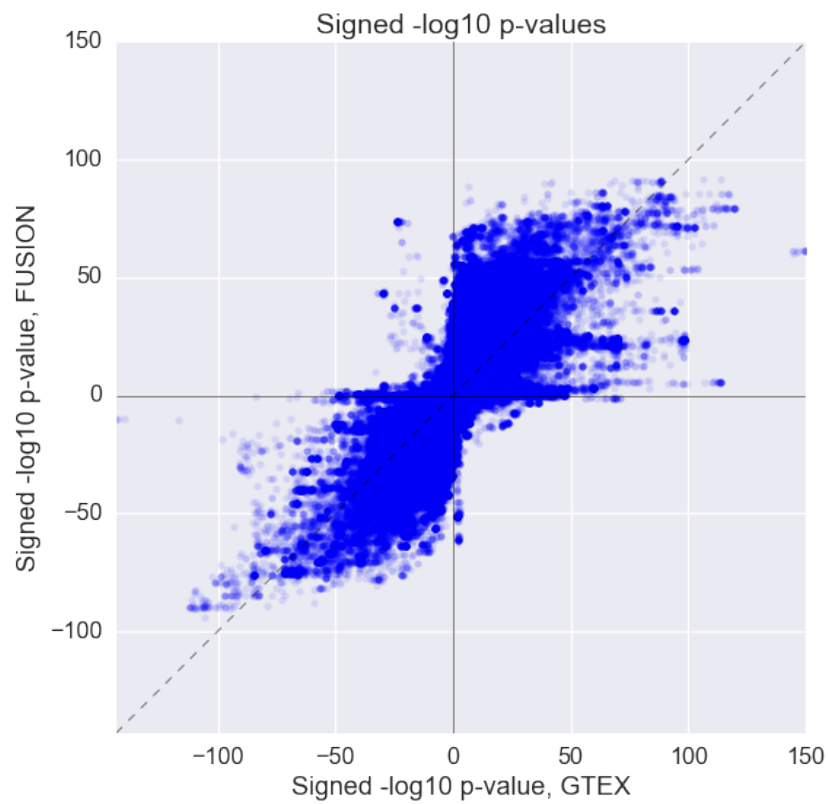

**Supplementary Figure 5.** Consistency in FUSION (N=267 skeletal muscle samples) and GTEx (N=361 skeletal muscle samples) cis-eQTL results. Here we show the signed (based on the estimated regression coefficient keyed to the same allele)  $\log_{10}(\text{P-values})$  for the 95.5M matching cis-eQTL results across the studies. Note that the large majority of results have a consistent direction of effect.

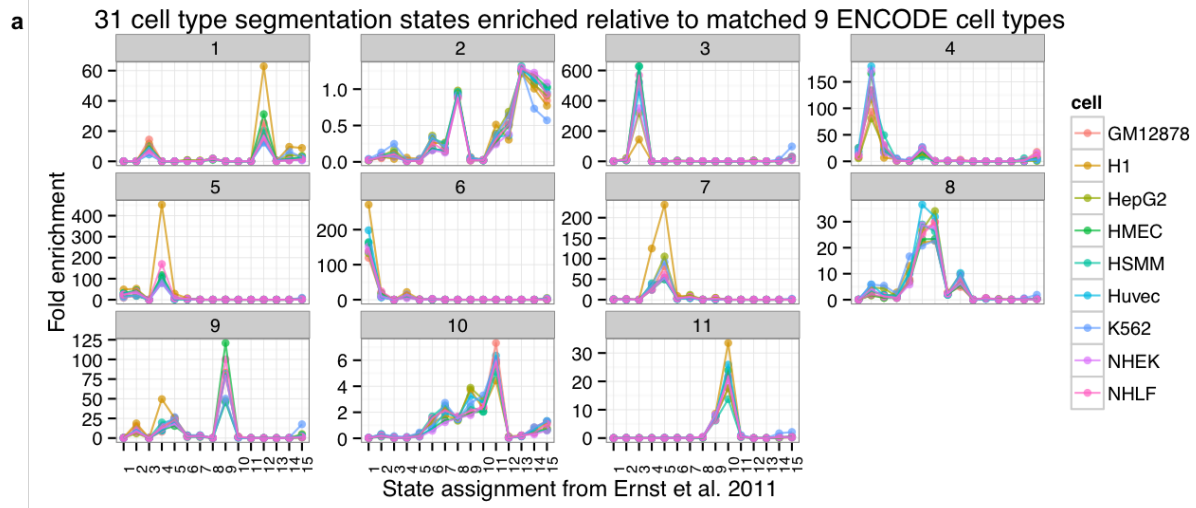

**b**

| original_state | new_state | state_name               |
|----------------|-----------|--------------------------|
| 1              | 12        | polycomb_repressed       |
| 2              | 13        | heterochromatin_low      |
| 3              | 3         | inactive_poised_promoter |
| 4              | 2         | weak_promoter            |
| 5              | 4         | strong_enhancer          |
| 6              | 1         | active_promoter          |
| 7              | 5         | strong_enhancer          |
| 8              | 7         | weak_enhancer            |
| 9              | 9         | transcription_transition |
| 10             | 11        | weak_transcribed         |
| 11             | 10        | transcription_elongation |

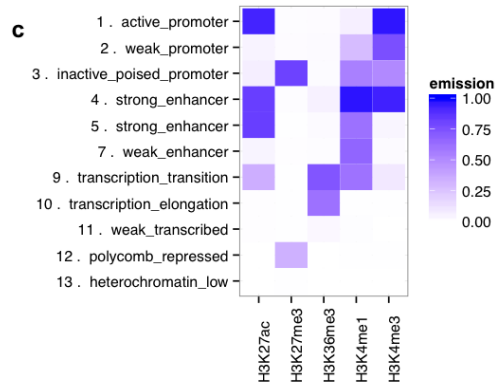

**Supplementary Figure 6.** Original state assignments from our ChromHMM run (in each facet) were compared to chromatin state assignments in the same cell types published by Ernst *et al.* 2011 (a). Based on enrichment with previously published chromatin state calls, we re-assigned our states (b). The emission probabilities of our re-assigned chromatin state model are represented in (c).

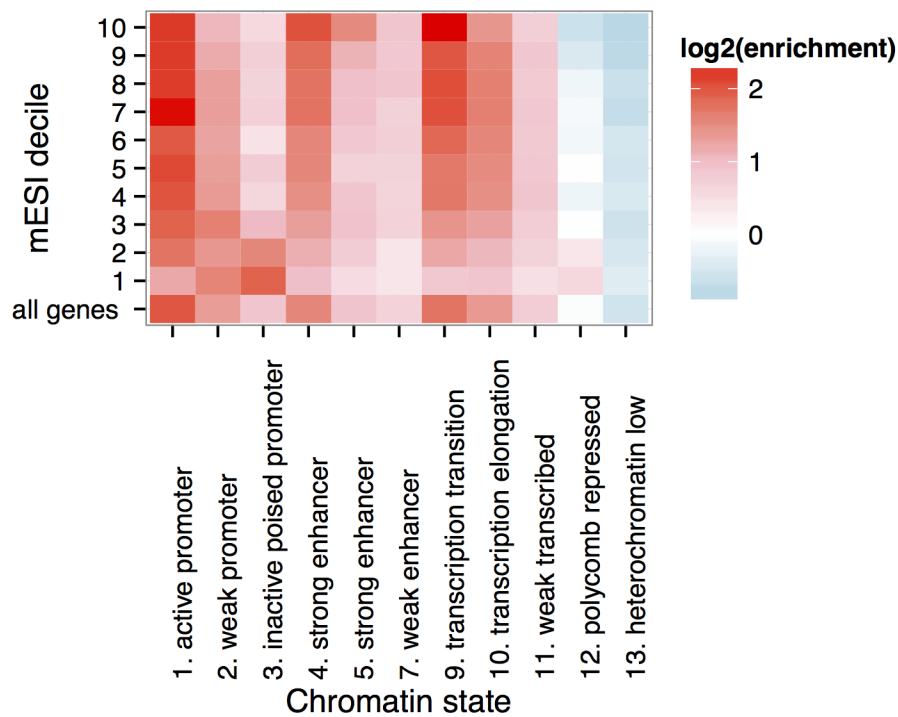

**Supplementary Figure 7.** Enrichment of 0.1% FDR cis-eQTL in different skeletal muscle chromatin states (x-axis) using either all genes or genes split by mESI decile (y-axis). Note that the level of enrichment increases with mESI decile for the enhancer states and decreases for the polycomb repressed states.

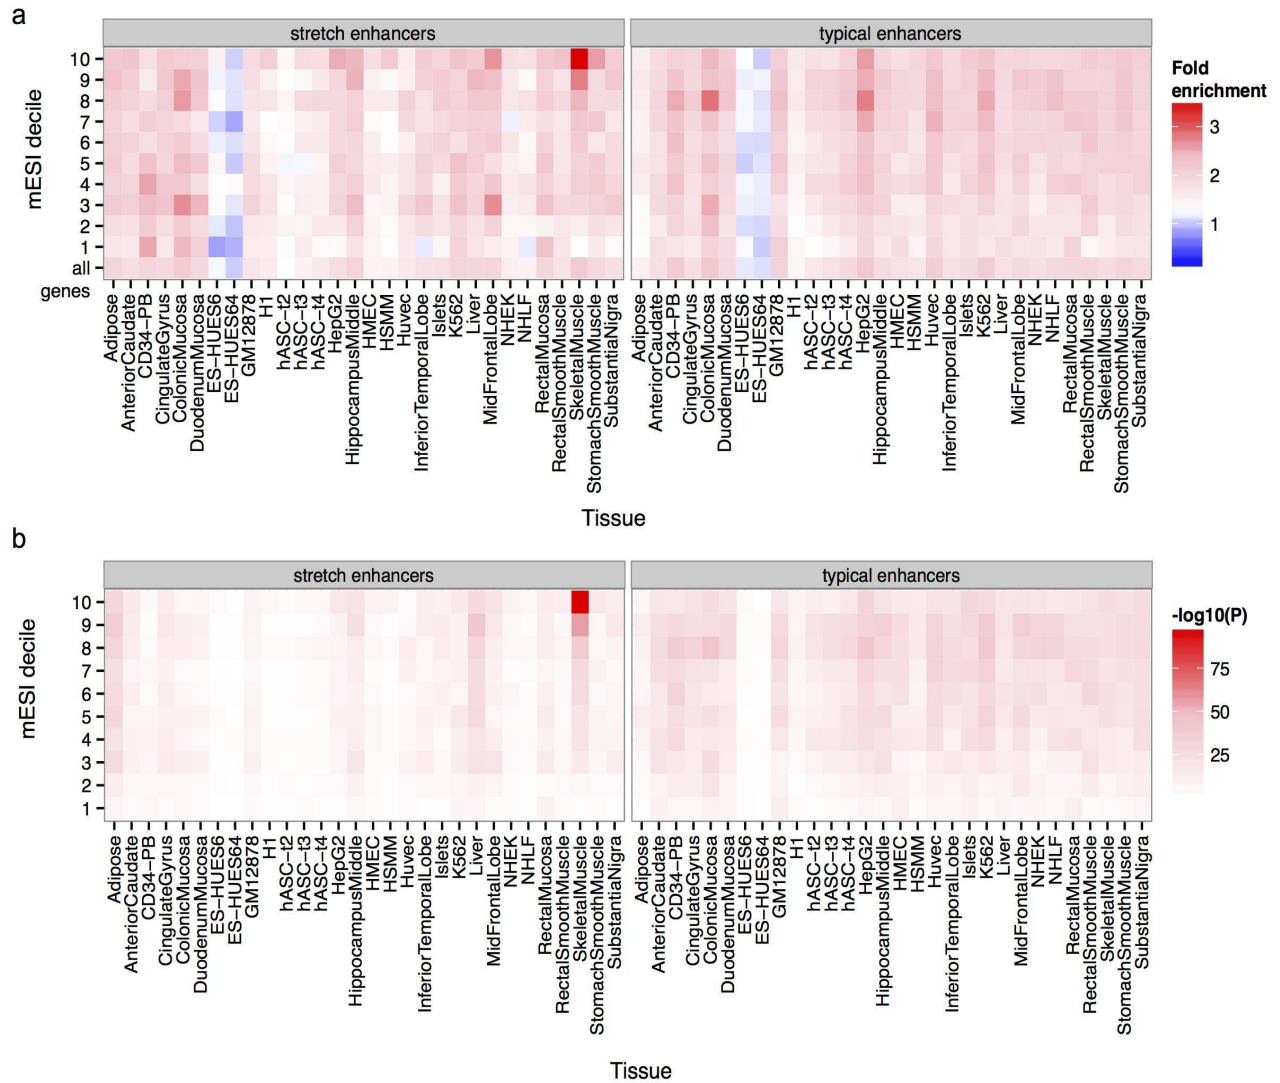

**Supplementary Figure 8.** Stretch and typical enhancer fold enrichment (a) and significance (b) for overlapping eQTL from difference mESI bins or all genes across multiple cell/tissue types. For skeletal muscle there are 15,007 stretch and 54,878 typical enhancers.



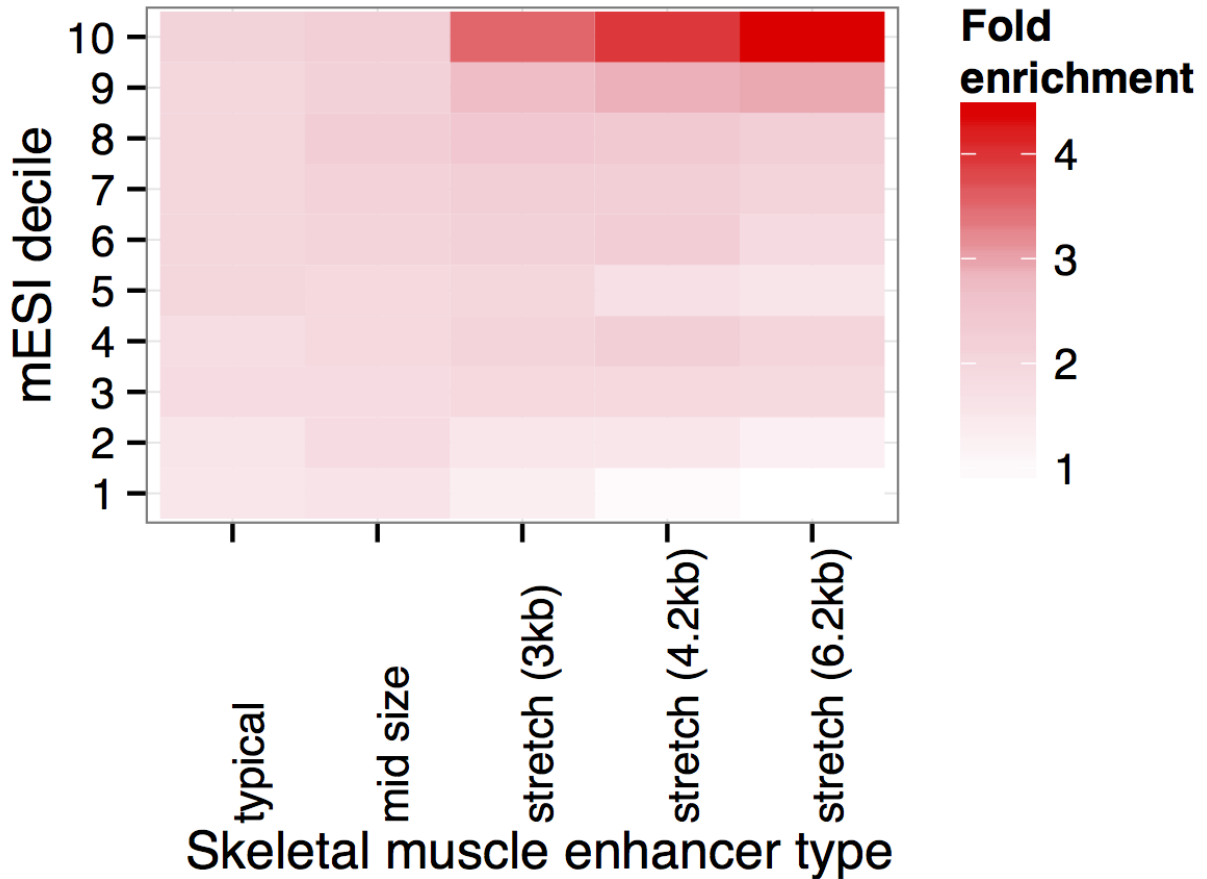

**Supplementary Figure 9.** Skeletal muscle stretch, typical, and mid-size enhancer fold enrichment for overlapping skeletal muscle eQTL from different mESI bins. Stretch enhancer thresholds of 3.0kb, 4.2kb, and 6.2kb correspond to the previously defined thresholds of the top 10%, 5%, and 1% of enhancer lengths, respectively. Note that the enrichment trend is consistent regardless of the stretch enhancer threshold used. Typical ( $\leq 800$ bp; median length) and mid-size ( $> 800$ bp and  $< 3$ kb) enhancers are shown as controls and do not have progressively increasing enrichment trends like stretch enhancers.

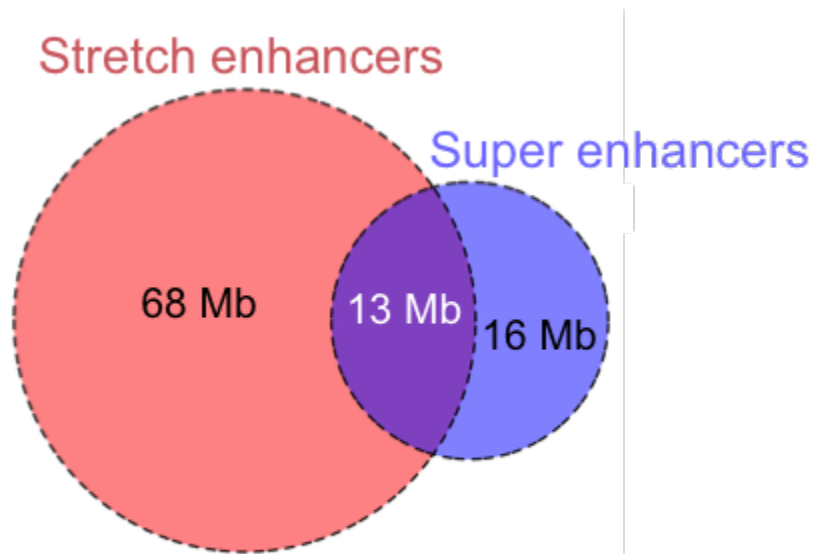

**Supplementary Figure 10.** Skeletal muscle stretch (default 3.0kb threshold) and super enhancer base pair level overlap comparison.

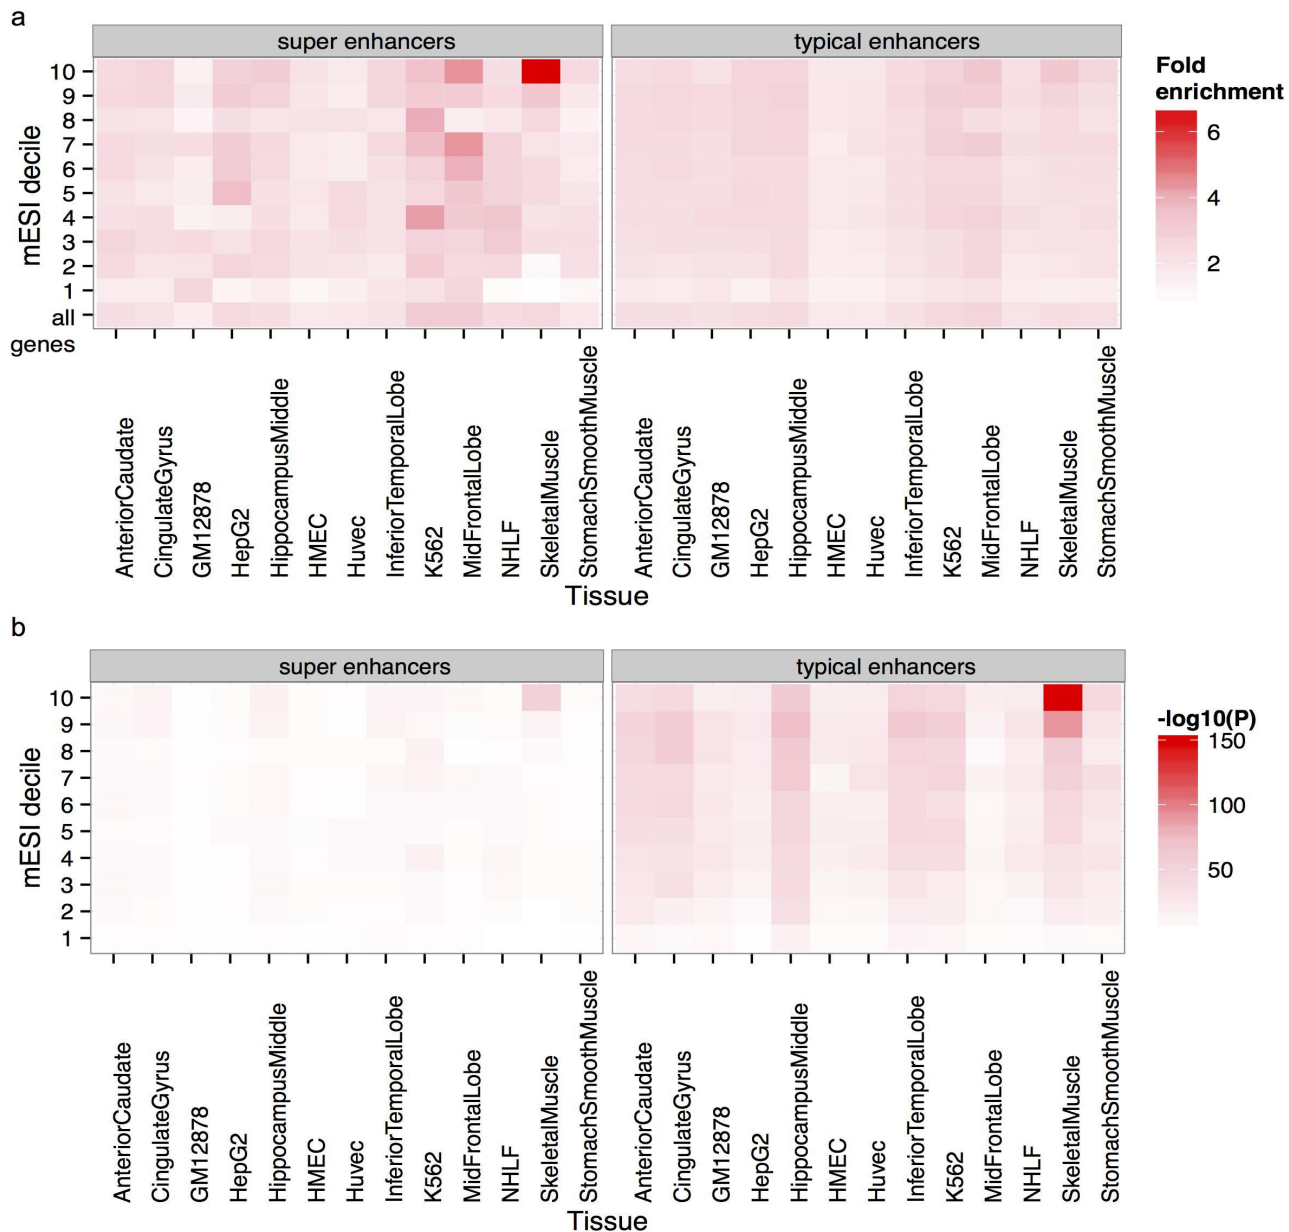

**Supplementary Figure 11.** Super and typical enhancer (based on super enhancer definition) fold enrichment (a) and significance (b) for overlapping eQTL from difference mESI bins or all genes across multiple cell/tissue types. For skeletal muscle there are 618 super and 18,620 typical enhancers. This large difference in N allows for the skeletal muscle typical enhancers to have more significant p-values (b) even though the enrichment is lower (a) compared to skeletal muscle super enhancers.

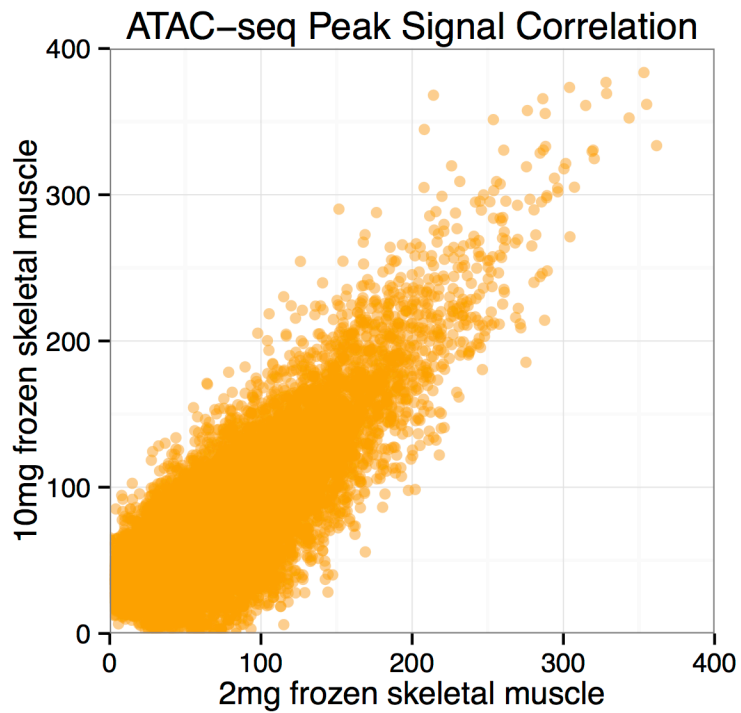

**Supplementary Figure 12.** Signal correlation across frozen skeletal muscle ATAC-seq 10mg and 2mg input replicates. Peaks were called on individual replicates using MACS2 (see Methods) and then merged across each. Signal within each merged peak is quantified in RPKM units. Pearson's  $R = 0.815$ .

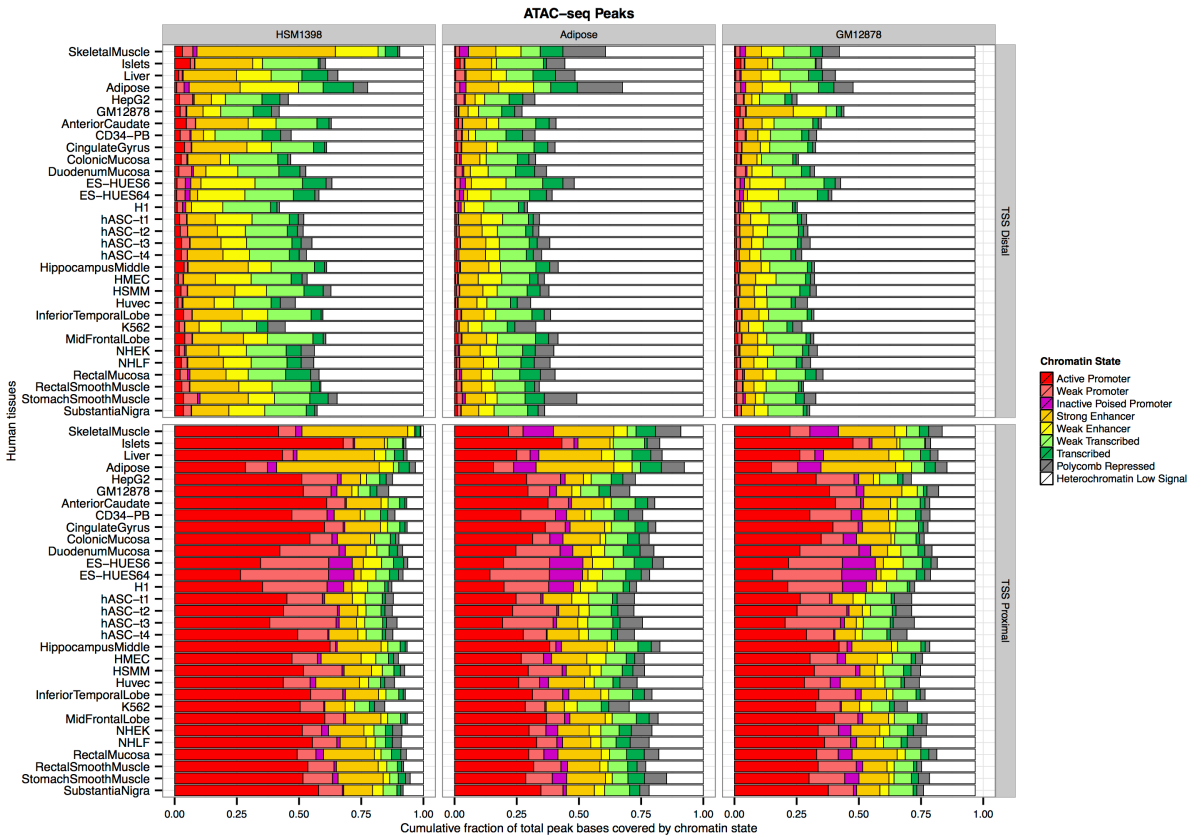

**Supplementary Figure 13.** Comparison of ATAC-seq peak calls in three cell types (columns) with chromatin states across diverse tissues (y-axis). Skeletal muscle (sample = HSM1398) combined replicate ATAC-seq peak calls (left column) show enrichment for skeletal muscle active chromatin states, which is more pronounced at TSS-distal (>5kb from TSS) regions. Adipose (middle column) and GM12878 (right column) ATAC-seq peak calls show similar trends with chromatin states from matched tissues.

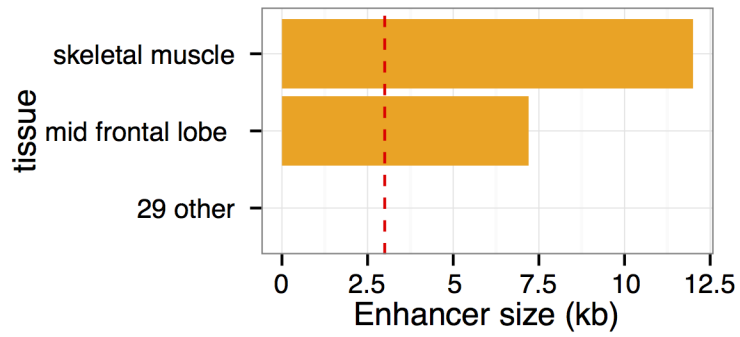

**Supplementary Figure 14.** Enhancer length overlaps at the T2D GWAS tag SNP rs516946, which is the best cis-eQTL SNP for *ANK1*. The vertical dashed red line represents the default 3kb length threshold for calling stretch enhancers.

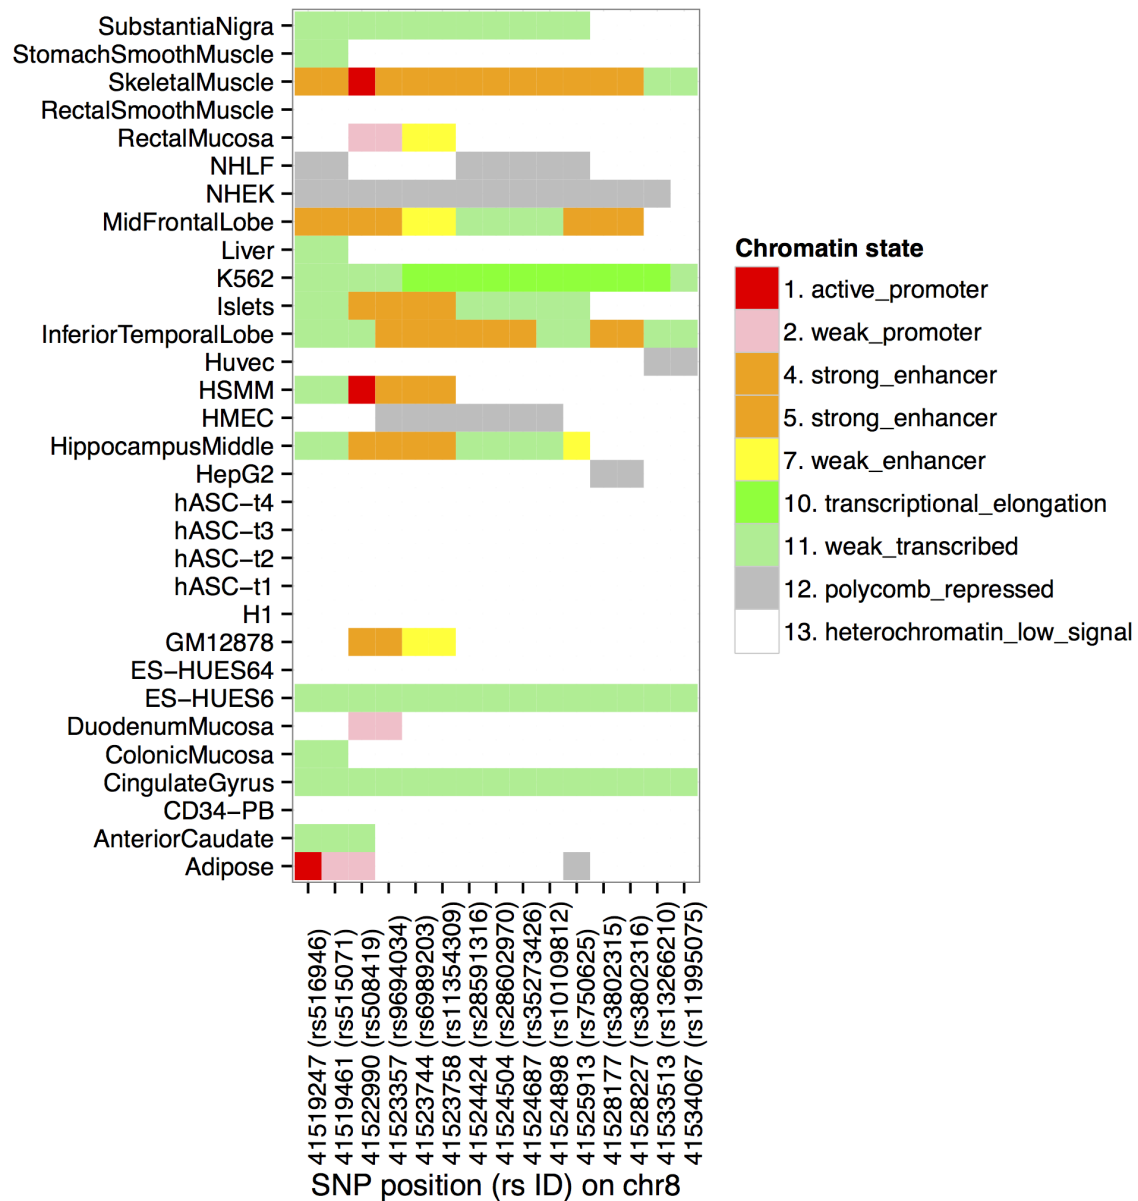

**Supplementary Figure 15.** Chromatin states overlapping the *ANK1* cis-eQTL T2D GWAS tag SNP rs516946 and those in close ( $r^2 \geq 0.8$ ) LD across diverse cells/tissues. Note that rs508419 overlaps an active promoter state in skeletal muscle and HSMM and is flanked by strong enhancer states.

rs508419  
A(non-risk)/G(risk)

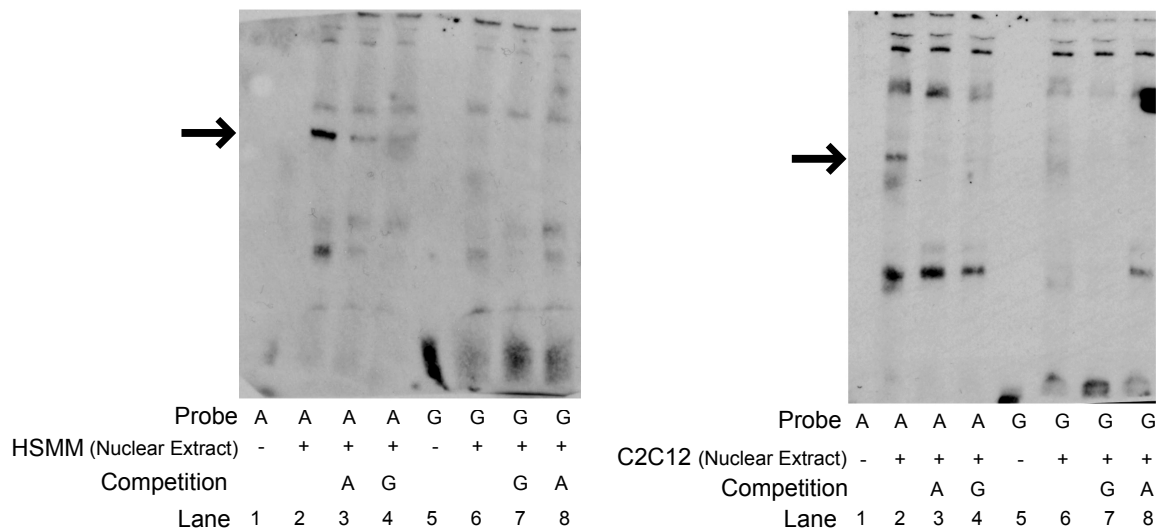

**Supplementary Figure 16.** EMSA results using human (HSMM; left) and mouse (C2C12; right) myoblast cell nuclear extract.



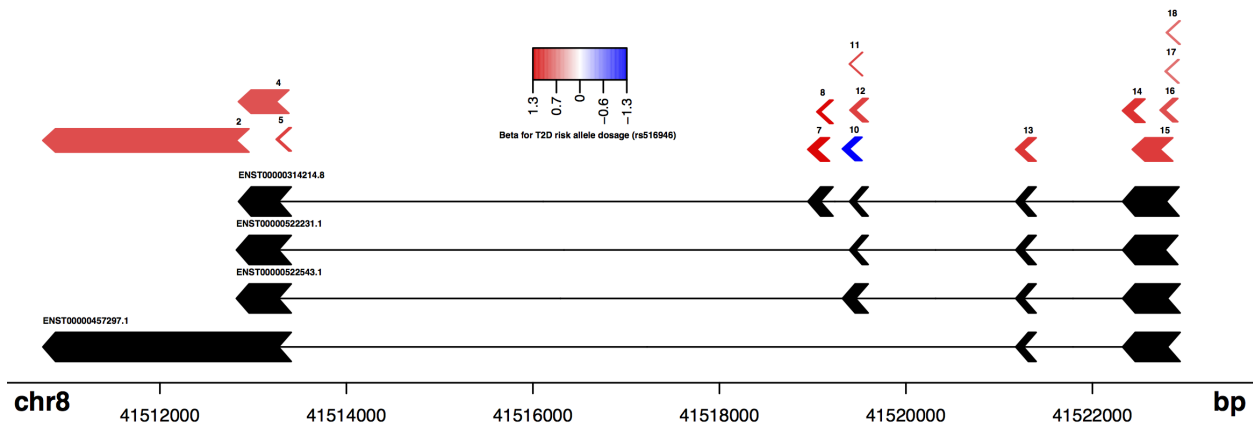

**Supplementary Figure 17.** We performed an exonQTL analysis on all exonic parts for GENCODE V19 transcripts (see Methods) and show the results for the four short *ANK1* isoforms. Note that exonic part 10 is diagnostic for ENST00000522543.1 and shows decreased splicing with risk allele dosages. These results are consistent sQTL results we report in **Figs. 5bc** and with the RT-qPCR (**Supplementary Figs. 18 and 19**) and ddPCR (**Supplementary Fig. 20**).

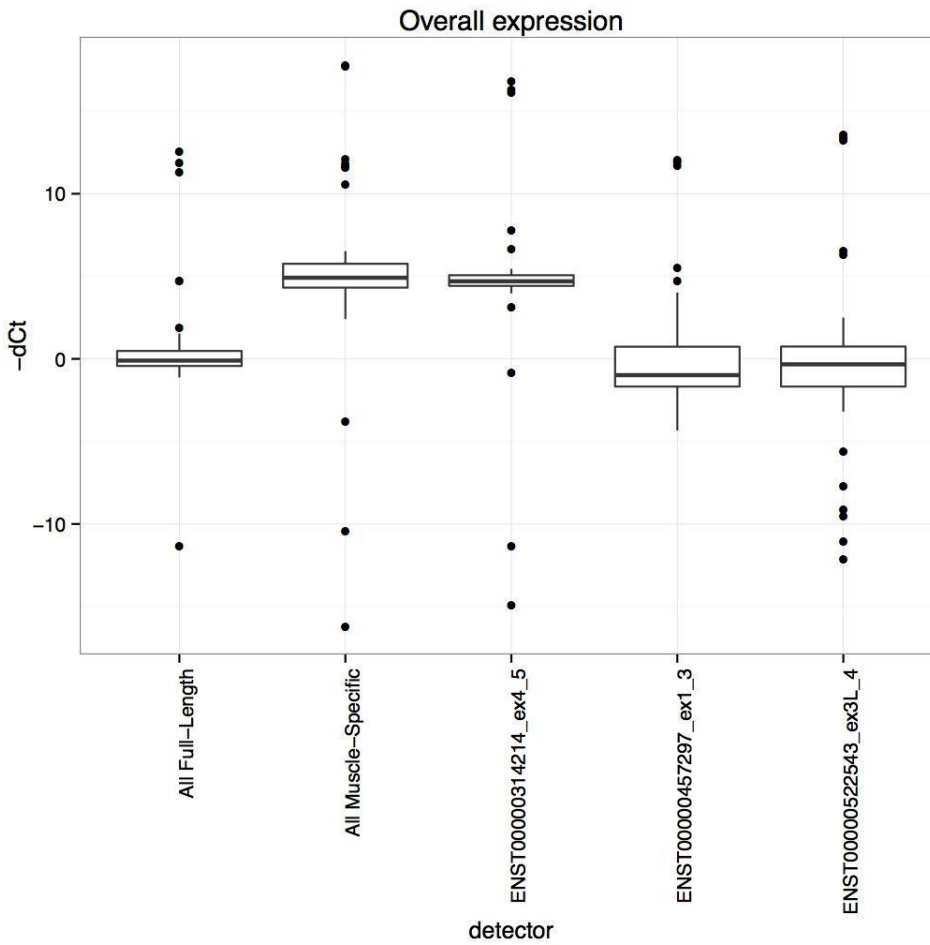

**Supplementary Figure 18.** RT-qPCR results for *ANK1* isoforms. Twelve samples were assayed, four each from each of the three possible genotype classes at rs508149 (risk allele dosage of 0, 1, or 2). Values are expressed as the inverse of the difference between the Ct values of the target and control (*EMC7*) genes, *i.e.*  $Ct(EMC7) - Ct(\text{target})$ ; therefore, greater values indicate higher expression.

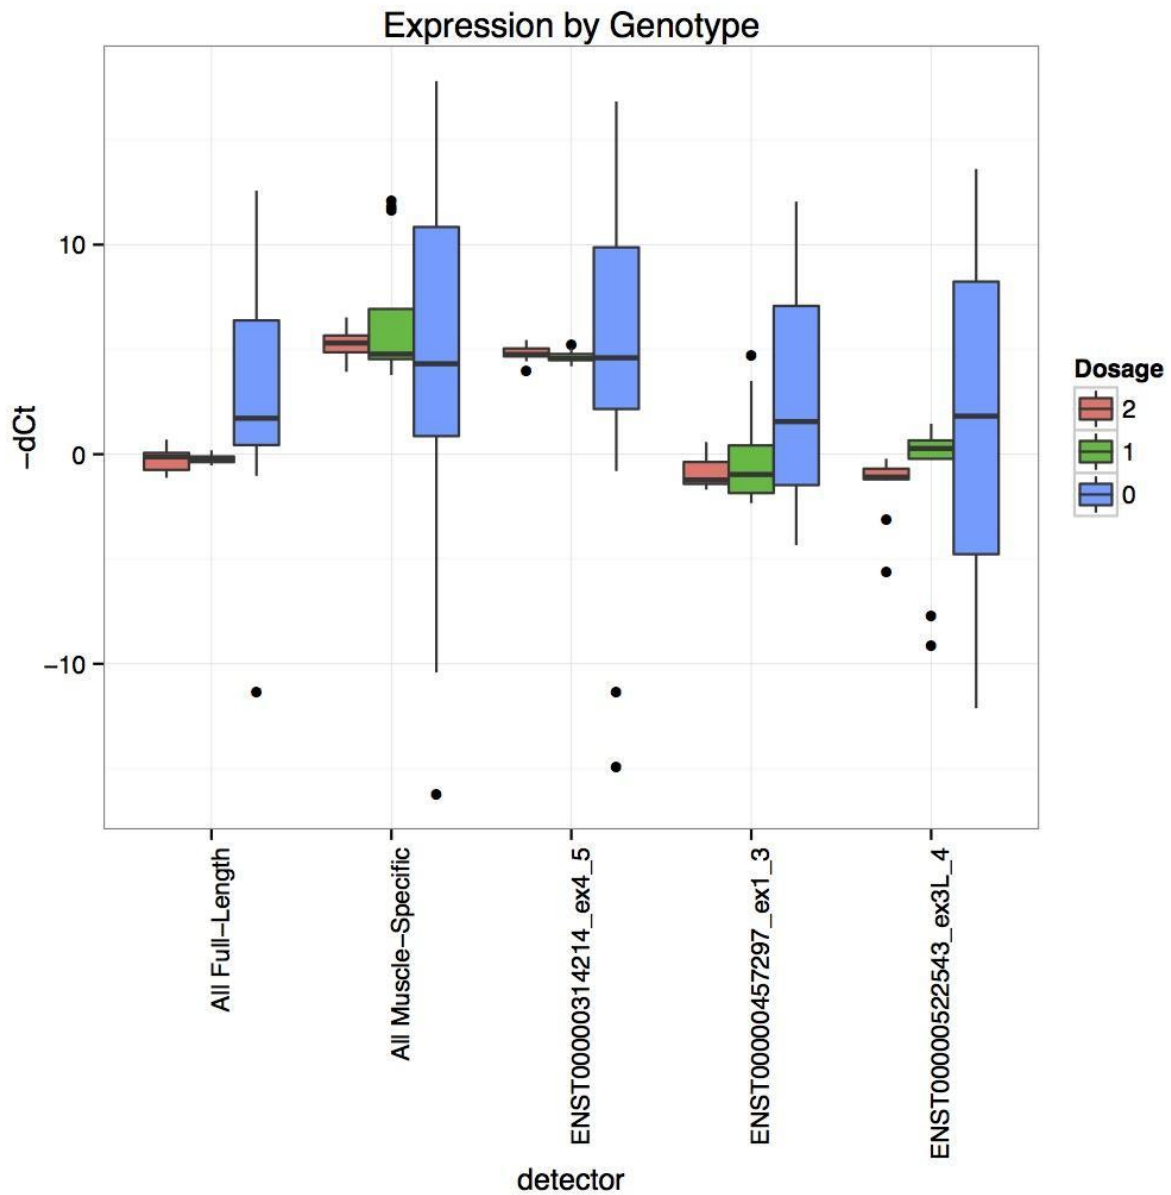

**Supplementary Figure 19.** RT-qPCR results for *ANK1* isoforms for each of the three possible genotype classes at rs508149 (risk allele dosage of 0, 1, or 2). Values are expressed as the inverse of the difference between the Ct values of the target and control (*EMC7*) genes, *i.e.*  $Ct(EMC7) - Ct(target)$ ; therefore, greater values indicate higher expression.

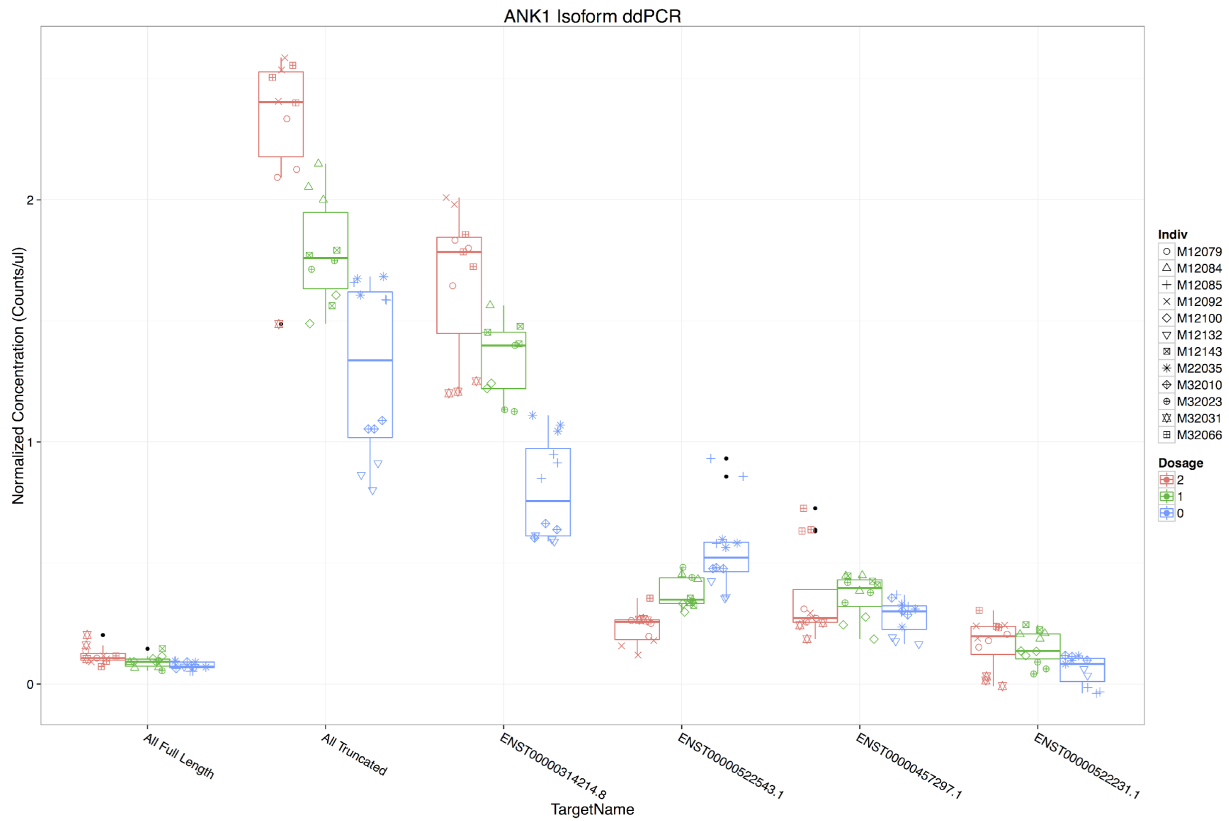

**Supplementary figure 20.** Results of ddPCR quantification for 12 samples, 4 each with the three possible risk allele dosages. Values are expressed as normalized concentrations and were computed by first subtracting the median of the no-template control and then dividing by the median of the constant assay (*NUCKS1*) within each sample.

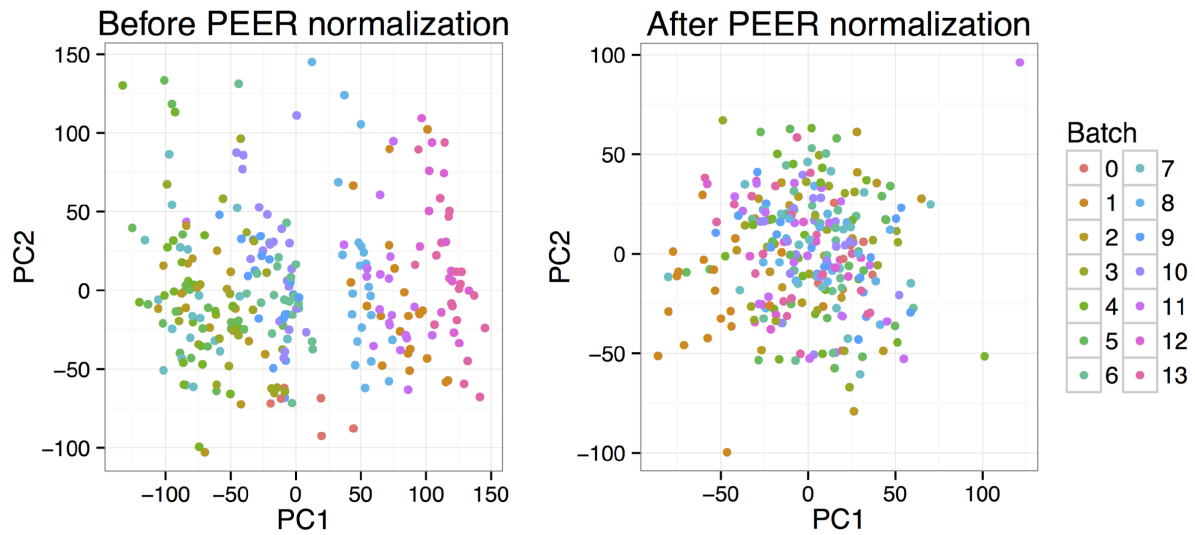

**Supplementary Figure 21.** Scatter plot of the first 2 principal components on the expression matrix for nuclear genome genes, before (left) and after (right) PEER adjustment. Color-labeling by sequencing batch revealed the presence of systematic batch effects (left). Principal components analysis after normalization using the PEER framework demonstrates removal of batch effects (right).

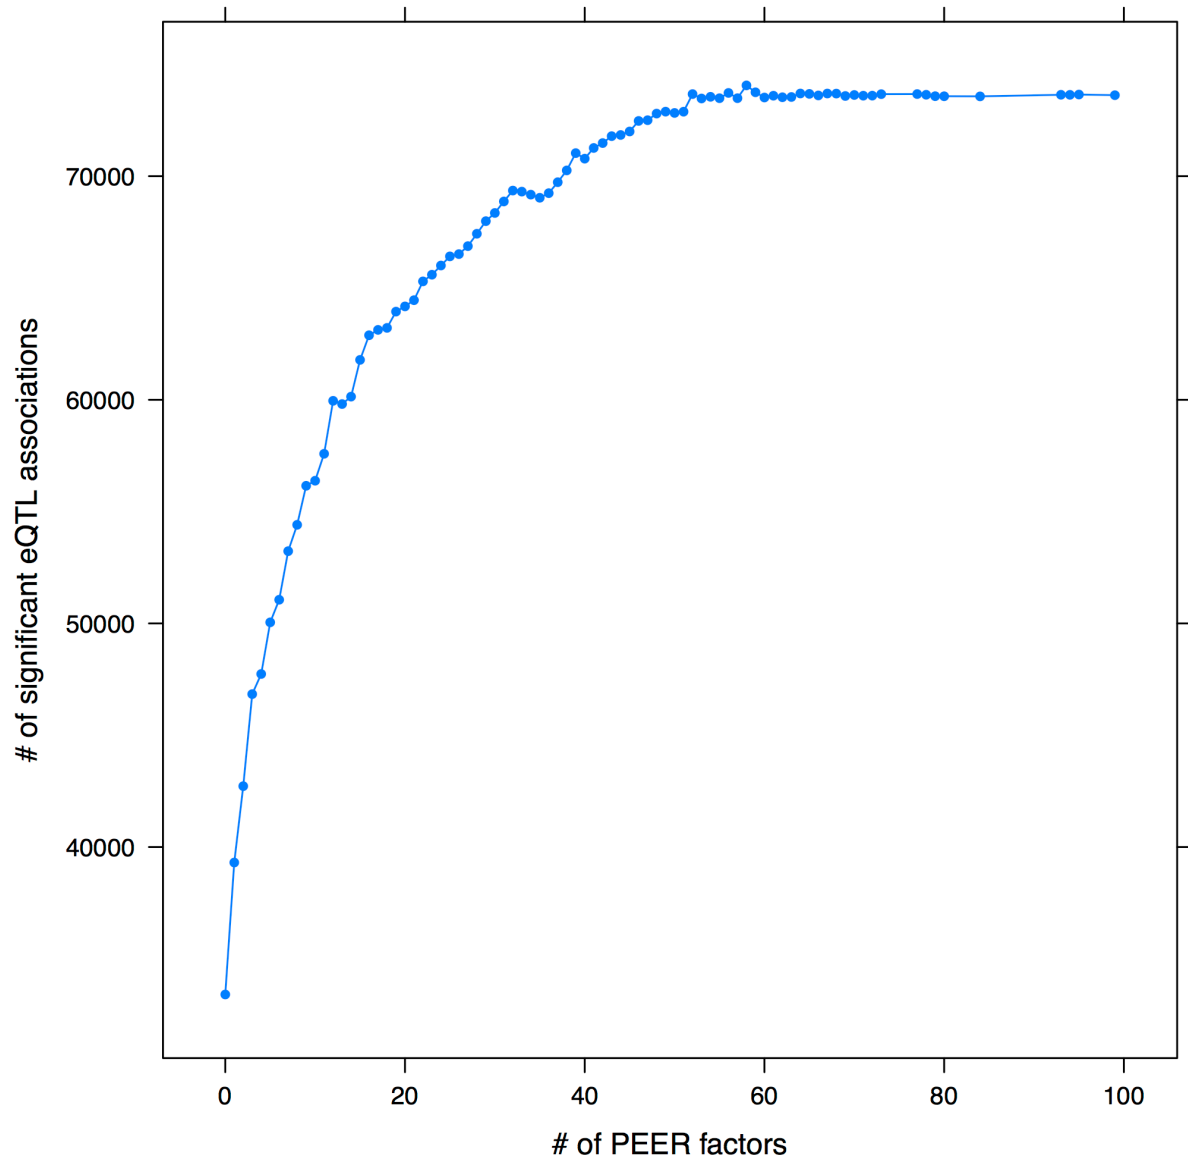

**Supplementary Figure 22.** cis-eQTL analyses using a diverse number of PEER factors reveals a plateau in the number of significant eQTL associations (FDR=5%) at 60, which is the number we used in our final analysis.

| Analysis                              | Differential Expression          |                                |                                |                                |                                | e-QTL                            |
|---------------------------------------|----------------------------------|--------------------------------|--------------------------------|--------------------------------|--------------------------------|----------------------------------|
|                                       | Total                            | NGT                            | IFG                            | IGT                            | T2D                            | Total                            |
| N                                     | 271                              | 97                             | 36                             | 71                             | 67                             | 267                              |
| OGTT Status( n(%))                    |                                  |                                |                                |                                |                                |                                  |
| NGT                                   | 97 (35.8%)                       | 97(100%)                       | 0 (0%)                         | 0 (0%)                         | 0 (0%)                         | 97 (36.3%)                       |
| IFG                                   | 36 (13.3%)                       | 0 (0%)                         | 36 (100%)                      | 0 (0%)                         | 0 (0%)                         | 35 (13.1%)                       |
| IGT                                   | 71 (26.2%)                       | 0 (0%)                         | 0 (0%)                         | 71 (100%)                      | 0 (0%)                         | 69 (25.8%)                       |
| T2D                                   | 67 (24.7%)                       | 0 (0%)                         | 0 (0%)                         | 0 (0%)                         | 67 (100%)                      | 66 (24.7%)                       |
| Sex (N, %)                            | 160 M (59.0%) /<br>111 F (41.0%) | 46 M (47.4%) /<br>51 F (52.6%) | 24 M (66.7%) /<br>12 F (33.3%) | 38 M (53.5%) /<br>33 F (46.5%) | 52 M (77.6%) /<br>15 F (22.4%) | 157 M (58.8%) /<br>110 F (41.2%) |
| Age (mean(SD)), y                     | 60.1 (7.0)                       | 58.1 (7.0)                     | 57.8 (7.4)                     | 62.9 (5.3)                     | 61.1 (7.3)                     | 60.1 (7.0)                       |
| Fasting glucose (mean(SD)),<br>mmol/l | 6.26 (0.77)                      | 5.61 (0.33)                    | 6.42 (0.28)                    | 6.19 (0.54)                    | 7.17 (0.65)                    | 6.26 (0.78)                      |
| Fasting insulin (mean(SD)), mU/l      | 8.69 (5.31)                      | 6.72 (3.32)                    | 7.57 (3.46)                    | 10.07 (5.60)                   | 10.67 (6.87)                   | 8.65 (5.27)                      |
| WHR (mean(SD))                        | 0.950 (0.077)                    | 0.920 (0.077)                  | 0.945 (0.071)                  | 0.954 (0.073)                  | 0.990 (0.067)                  | 0.949 (0.078)                    |
| BMI (mean(SD)), kg/m <sup>2</sup>     | 27.6 (4.2)                       | 26.2 (3.4)                     | 26.4 (3.4)                     | 28.3 (3.8)                     | 29.4 (5.0)                     | 27.6 (4.2)                       |

**Supplementary Table 1.** Summary statistics for individuals that participated in this study.

| Gene Type Category <sup>a</sup> | Genes/Exons/Isoforms Tested <sup>b</sup> |         |              | Genic Analysis eQTL |                         | Exon Analysis eQTL <sup>d</sup> |                         | Isoform FPKM Analysis eQTL |                         |
|---------------------------------|------------------------------------------|---------|--------------|---------------------|-------------------------|---------------------------------|-------------------------|----------------------------|-------------------------|
|                                 | Genes                                    | Exons   | Isoform FPKM | Genes <sup>c</sup>  | % of Category with eQTL | Exons <sup>c</sup>              | % of Category with eQTL | Transcripts <sup>c</sup>   | % of Category with eQTL |
| protein_coding                  | 15,449                                   | 353,596 | 63,158       | 14,479              | 93.6                    | 269,871                         | 76.3                    | 34,836                     | 55.2                    |
| pseudogene                      | 2,147                                    | 14,528  | 792          | 1,747               | 80.5                    | 11,233                          | 77.3                    | 433                        | 54.7                    |
| antisense                       | 1,667                                    | 7,398   | 7,597        | 1,535               | 92.0                    | 5,878                           | 79.5                    | 3,755                      | 49.4                    |
| lincRNA                         | 1,561                                    | 6,715   | 5,536        | 1,437               | 91.5                    | 5,330                           | 79.4                    | 2,702                      | 48.8                    |
| processed_transcript            | 244                                      | 8,755   | 845          | 229                 | 93.9                    | 7,022                           | 80.2                    | 435                        | 51.5                    |
| sense_intronic                  | 212                                      | 1,319   | 643          | 186                 | 87.7                    | 1,037                           | 78.6                    | 320                        | 49.8                    |
| sense_overlapping               | 92                                       | 1,252   | 179          | 84                  | 91.3                    | 993                             | 79.3                    | 109                        | 60.9                    |
| Total                           | 21,420                                   | 393,563 | 78,750       | 19,697              | 92.0                    | 301,364                         | 76.6                    | 42,590                     | 54.1                    |

**Supplementary Table 2. Count of genes, exons, and isoforms with at least 1 significant eQTL, stratified by gene type.** <sup>a</sup>Gene type from GENCODE v19; <sup>b</sup>The total number of gene, exons and isoforms tested for eQTLs (genes with at least 1 tested SNP); <sup>c</sup>Number of genes, exons, or isoforms with  $\geq 1$  eQTL; <sup>d</sup>Exons that are annotated to more than one gene are included once in the table for each annotate gene category.
